# Supplementary material
Source: PubMed Central journal article supplement (PMC3242657)

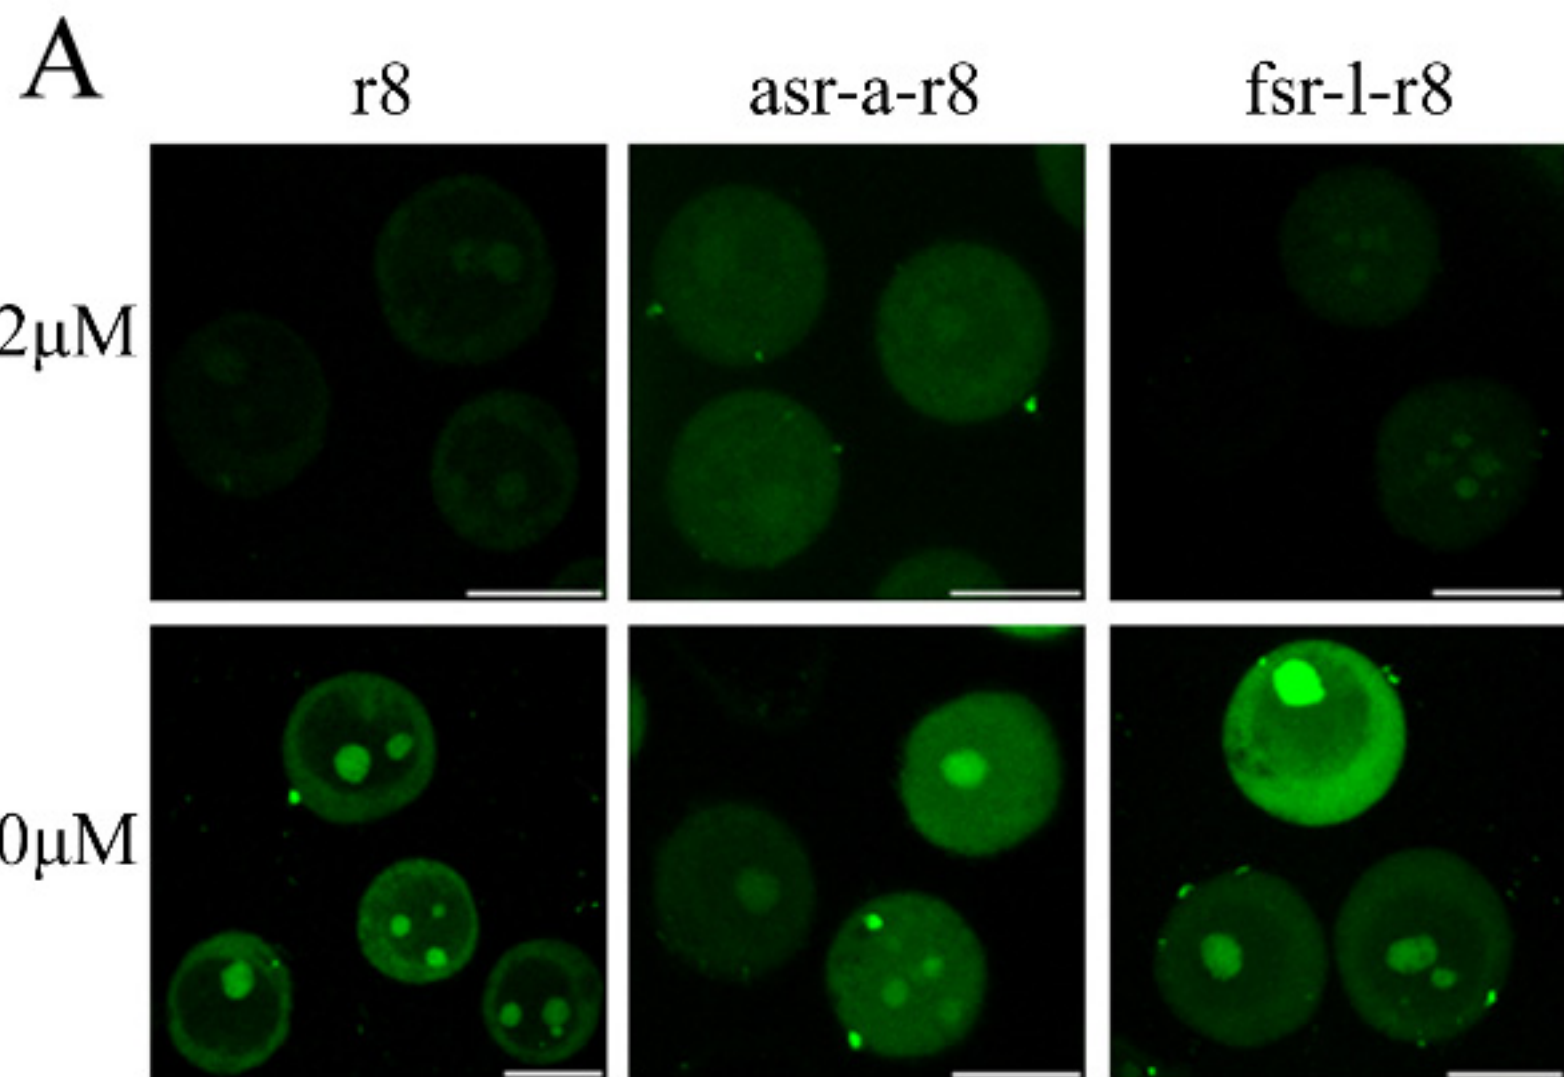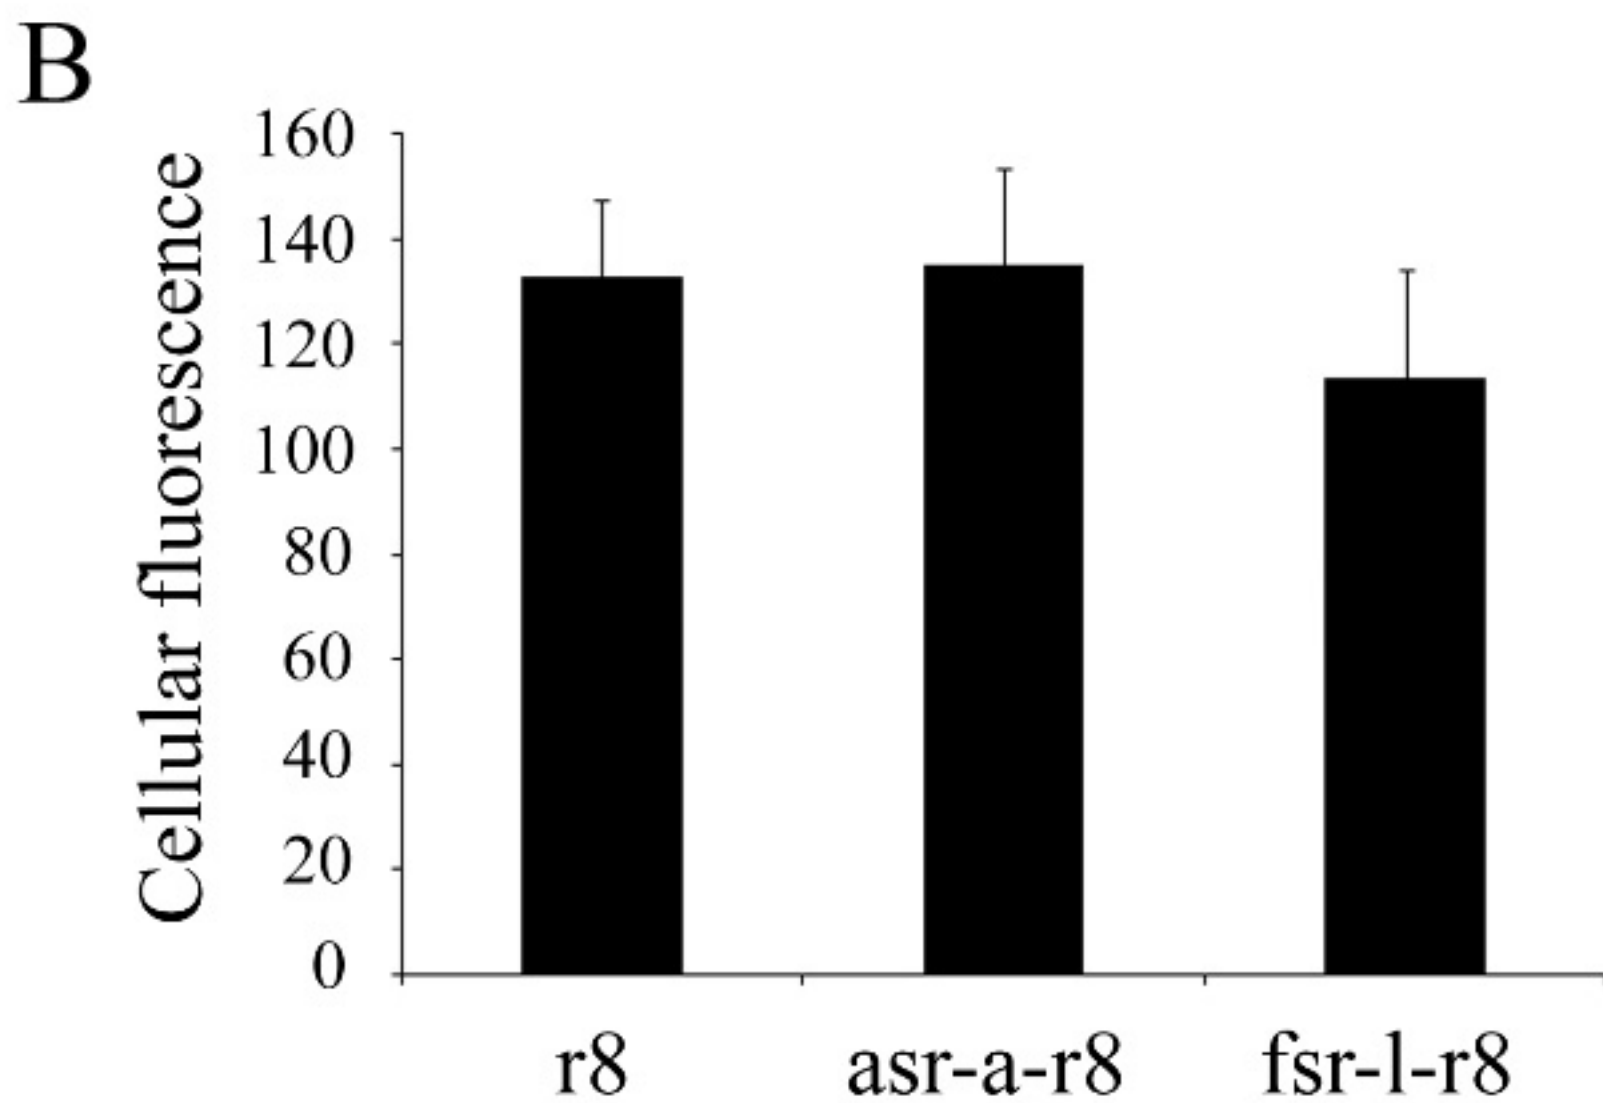

Supplement: mt2011175x2.pdf [file mt2011175x2.pdf]
